# Supplementary figures and images for: Structural Transitions of Papain-like Cysteine Proteases: Implications for Sensor Development
Source: MDPI journal article supplement (doi:10.3390/biomimetics8030281), 2023-07-01

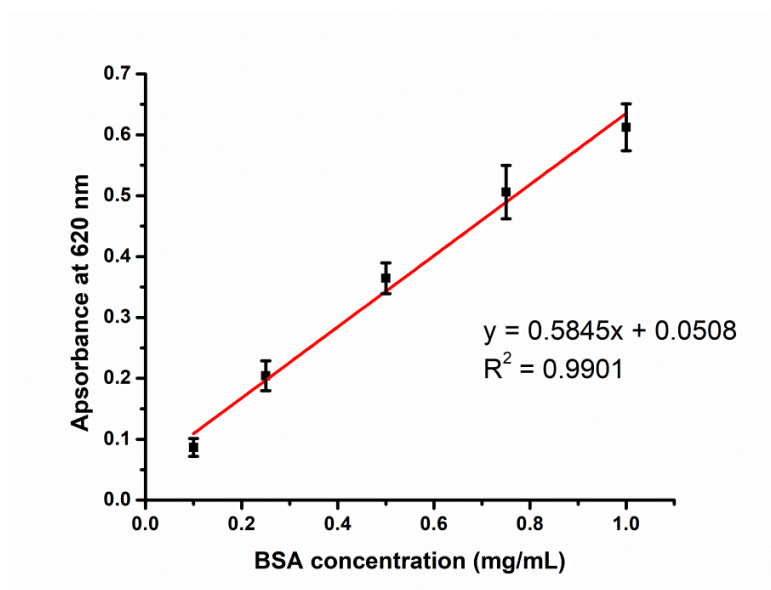

Supplementary Figure S1. Calibration curve for Bradford assay.

Supplement: s1 [file s1]
